# Supplementary material for: Speech paired vagus nerve stimulation restores neural sound processing in a rat model of autism
Source: Front Neurosci. 2025 Jun 13;19:1600024. doi: 10.3389/fnins.2025.1600024 (PMC12202670; doi:10.3389/fnins.2025.1600024)
Supplement: Supplementary file 2 [file Table_1.xlsx]

## Sheet: Supplemental Table 1
			Figure	Model	Groups (n sites / n animal)	Bandwidth / Octave	Back transformed estimated marginal mean	Lower CI	Upper CI	SE	Contrast	Pvalue
			SFigure1a(a)	GLMM: BW10 ~ Group + Sex + Group * Sex + (1 | Animal/Channel), family = tweedie(link="log")	Saline (n=357/10)	10 (dB above threshold)	1.46	1.34	1.6	0.06	SAL / VPA	0.65
					VPA (n=330/10)		1.55	1.41	1.71	0.07	SAL / VPA+VNS	0.69
					VNS (n=287/8)		1.55	1.4	1.72	0.08	VPA / VPA+VNS	0.99
			SFigure1a(b)	GLMM: BW20 ~ Group + Sex + Group * Sex + (1 | Animal/Channel), family = tweedie(link="log")	Saline (n=357/10)	20 (dB above threshold)	2.06	1.88	2.26	0.09	SAL / VPA	0.69
					VPA (n=330/10)		2.18	1.98	2.41	0.1	SAL / VPA+VNS	0.84
					VNS (n=287/8)		2.15	1.93	2.39	0.11	VPA / VPA+VNS	0.97
			SFigure1a(c)	GLMM: BW30 ~ Group + Sex + Group * Sex + (1 | Animal/Channel), family = tweedie(link="log")	Saline (n=357/10)	30 (dB above threshold)	2.49	2.26	2.73	0.11	SAL / VPA	0.99
					VPA (n=330/10)		2.5	2.26	2.76	0.12	SAL / VPA+VNS	0.42
					VNS (n=287/8)		2.72	2.45	3.03	0.14	VPA / VPA+VNS	0.49
			SFigure1a(d)	GLMM: BW40 ~ Group + Sex + Group * Sex + (1 | Animal/Channel), family = tweedie(link="log")	Saline (n=357/10)	40 (dB above threshold)	2.62	2.39	2.88	0.12	SAL / VPA	0.92
					VPA (n=330/10)		2.69	2.44	2.97	0.13	SAL / VPA+VNS	0.2
					VNS (n=287/8)		2.96	2.67	3.29	0.15	VPA / VPA+VNS	0.4
			SFigure1b	GLMM: Percent ~ Group + Octave + Group * Octave, family = tweedie(link="log")	Saline (n=357/10)	1-2kHz (Octave)	15.46	11.94	20.01	2.04	SAL / VPA	0.6
					VPA (n=330/10)		12.84	9.7	17.01	1.84	SAL / VPA+VNS	0.01
					VNS (n=287/8)		8.01	5.43	11.83	1.59	VPA / VPA+VNS	0.13
			SFigure1b	GLMM: Percent ~ Group + Octave + Group * Octave, family = tweedie(link="log")	Saline (n=357/10)	2-4kHz (Octave)	5.15	3.36	7.89	1.12	SAL / VPA	0.68
					VPA (n=330/10)		6.58	4.49	9.63	1.28	SAL / VPA+VNS	0.8
					VNS (n=287/8)		4.16	2.46	7.04	1.12	VPA / VPA+VNS	0.34
			SFigure1b	GLMM: Percent ~ Group + Octave + Group * Octave, family = tweedie(link="log")	Saline (n=357/10)	4-8kHz (Octave)	17.35	13.58	22.17	2.17	SAL / VPA	0.94
					VPA (n=330/10)		16.42	12.77	21.1	2.1	SAL / VPA+VNS	0.86
					VNS (n=287/8)		19.07	14.67	24.78	2.55	VPA / VPA+VNS	0.69
			SFigure1b	GLMM: Percent ~ Group + Octave + Group * Octave, family = tweedie(link="log")	Saline (n=357/10)	8-16kHz (Octave)	27.42	22.48	33.44	2.78	SAL / VPA	0.42
					VPA (n=330/10)		22.74	18.31	28.23	2.51	SAL / VPA+VNS	0.99
					VNS (n=287/8)		27.03	21.62	33.81	3.08	VPA / VPA+VNS	0.51
			SFigure1b	GLMM: Percent ~ Group + Octave + Group * Octave, family = tweedie(link="log")	Saline (n=357/10)	16-32kHz (Octave)	32.65	27.1	39.12	3.05	SAL / VPA	0.34
					VPA (n=330/10)		38.84	32.79	46.01	3.36	SAL / VPA+VNS	0.28
					VNS (n=287/8)		39.86	33.06	48.07	3.81	VPA / VPA+VNS	0.97
			SFigure1c	GLMM: Spikes ~ Group + Octave + Group * Octave, family = tweedie(link="log")	Saline (n=357/10)	1-2kHz (Octave)	0.54	0.4	0.73	0.08	SAL / VPA	0.66
					VPA (n=330/10)		0.43	0.32	0.59	0.06	SAL / VPA+VNS	0.56
					VNS (n=287/8)		0.66	0.47	0.92	0.11	VPA / VPA+VNS	0.16
			SFigure1c	GLMM: Spikes ~ Group + Octave + Group * Octave, family = tweedie(link="log")	Saline (n=357/10)	2-4kHz (Octave)	0.58	0.43	0.78	0.08	SAL / VPA	0.57
					VPA (n=330/10)		0.46	0.34	0.63	0.07	SAL / VPA+VNS	0.5
					VNS (n=287/8)		0.74	0.53	1.04	0.12	VPA / VPA+VNS	0.1
			SFigure1c	GLMM: Spikes ~ Group + Octave + Group * Octave, family = tweedie(link="log")	Saline (n=357/10)	4-8kHz (Octave)	0.71	0.52	0.95	0.1	SAL / VPA	0.57
					VPA (n=330/10)		0.57	0.42	0.77	0.08	SAL / VPA+VNS	0.36
					VNS (n=287/8)		0.96	0.69	1.34	0.16	VPA / VPA+VNS	0.05
			SFigure1c	GLMM: Spikes ~ Group + Octave + Group * Octave, family = tweedie(link="log")	Saline (n=357/10)	8-16kHz (Octave)	0.65	0.48	0.88	0.09	SAL / VPA	0.52
					VPA (n=330/10)		0.52	0.38	0.7	0.07	SAL / VPA+VNS	0.39
					VNS (n=287/8)		0.88	0.63	1.22	0.14	VPA / VPA+VNS	0.05
			SFigure1c	GLMM: Spikes ~ Group + Octave + Group * Octave, family = tweedie(link="log")	Saline (n=357/10)	16-32kHz (Octave)	0.5	0.37	0.68	0.07	SAL / VPA	0.9
					VPA (n=330/10)		0.46	0.34	0.62	0.07	SAL / VPA+VNS	0.18
					VNS (n=287/8)		0.75	0.54	1.05	0.12	VPA / VPA+VNS	0.08
