# Supplementary material for: Speech paired vagus nerve stimulation restores neural sound processing in a rat model of autism
Source: Front Neurosci. 2025 Jun 13;19:1600024. doi: 10.3389/fnins.2025.1600024 (PMC12202670; doi:10.3389/fnins.2025.1600024)
Supplement: Supplementary file 3 [file Table_2.xlsx]

## Sheet: Supplemental Table 2
		Figure	Model	Intensity (dB)	Groups (n sites / n animal)	Back transformed estimated marginal mean	Lower CI	Upper CI	SE	Contrast	Pvalue
		Figure 1b	GLMM: Threshold ~ Group + Sex + Group * Sex + (1 | Animal/Channel), family = tweedie(link="log")	0	Saline (n=357/10)	0.25	0.22	0.29	0.01	SAL / VPA	<0.0001
					VPA (n=330/10)	0.06	0.05	0.08	0.006	SAL / VPA+VNS	<0.0001
					VNS (n=287/8)	0.11	0.09	0.13	0.01	VPA / VPA+VNS	0.0004
		Figure 1b	GLMM: Threshold ~ Group + Sex + Group * Sex + (1 | Animal/Channel), family = tweedie(link="log")	5	Saline (n=357/10)	0.27	0.23	0.31	0.02	SAL / VPA	<0.0001
					VPA (n=330/10)	0.11	0.09	0.14	0.01	SAL / VPA+VNS	0.04
					VNS (n=287/8)	0.2	0.17	0.24	0.01	VPA / VPA+VNS	<0.0001
		Figure 1b	GLMM: Threshold ~ Group + Sex + Group * Sex + (1 | Animal/Channel), family = tweedie(link="log")	10	Saline (n=357/10)	0.39	0.33	0.44	0.02	SAL / VPA	<0.0001
					VPA (n=330/10)	0.17	0.14	0.2	0.01	SAL / VPA+VNS	0.01
					VNS (n=287/8)	0.28	0.24	0.33	0.02	VPA / VPA+VNS	<0.0001
		Figure 1b	GLMM: Threshold ~ Group + Sex + Group * Sex + (1 | Animal/Channel), family = tweedie(link="log")	15	Saline (n=357/10)	0.44	0.38	0.5	0.03	SAL / VPA	<0.0001
					VPA (n=330/10)	0.23	0.19	0.26	0.01	SAL / VPA+VNS	0.42
					VNS (n=287/8)	0.38	0.33	0.45	0.03	VPA / VPA+VNS	<0.0001
		Figure 1b	GLMM: Threshold ~ Group + Sex + Group * Sex + (1 | Animal/Channel), family = tweedie(link="log")	20	Saline (n=357/10)	0.65	0.57	0.74	0.04	SAL / VPA	<0.0001
					VPA (n=330/10)	0.21	0.18	0.24	0.01	SAL / VPA+VNS	<0.0001
					VNS (n=287/8)	0.39	0.33	0.45	0.03	VPA / VPA+VNS	<0.0001
		Figure 1b	GLMM: Threshold ~ Group + Sex + Group * Sex + (1 | Animal/Channel), family = tweedie(link="log")	25	Saline (n=357/10)	0.65	0.57	0.74	0.04	SAL / VPA	<0.0001
					VPA (n=330/10)	0.23	0.2	0.28	0.01	SAL / VPA+VNS	0.0003
					VNS (n=287/8)	0.43	0.37	0.51	0.03	VPA / VPA+VNS	<0.0001
		Figure 1b	GLMM: Threshold ~ Group + Sex + Group * Sex + (1 | Animal/Channel), family = tweedie(link="log")	30	Saline (n=357/10)	0.68	0.59	0.77	0.04	SAL / VPA	<0.0001
					VPA (n=330/10)	0.24	0.2	0.28	0.01	SAL / VPA+VNS	<0.0001
					VNS (n=287/8)	0.43	0.37	0.5	0.03	VPA / VPA+VNS	<0.0001
		Figure 1b	GLMM: Threshold ~ Group + Sex + Group * Sex + (1 | Animal/Channel), family = tweedie(link="log")	35	Saline (n=357/10)	0.74	0.65	0.85	0.05	SAL / VPA	<0.0001
					VPA (n=330/10)	0.26	0.22	0.3	0.02	SAL / VPA+VNS	0.01
					VNS (n=287/8)	0.56	0.48	0.66	0.04	VPA / VPA+VNS	<0.0001
		Figure 1b	GLMM: Threshold ~ Group + Sex + Group * Sex + (1 | Animal/Channel), family = tweedie(link="log")	40	Saline (n=357/10)	0.78	0.69	0.89	0.05	SAL / VPA	<0.0001
					VPA (n=330/10)	0.24	0.21	0.28	0.01	SAL / VPA+VNS	0.0004
					VNS (n=287/8)	0.53	0.45	0.62	0.04	VPA / VPA+VNS	<0.0001
		Figure 1b	GLMM: Threshold ~ Group + Sex + Group * Sex + (1 | Animal/Channel), family = tweedie(link="log")	45	Saline (n=357/10)	0.82	0.72	0.94	0.05	SAL / VPA	<0.0001
					VPA (n=330/10)	0.28	0.24	0.33	0.02	SAL / VPA+VNS	0.0003
					VNS (n=287/8)	0.55	0.48	0.64	0.04	VPA / VPA+VNS	<0.0001
		Figure 1b	GLMM: Threshold ~ Group + Sex + Group * Sex + (1 | Animal/Channel), family = tweedie(link="log")	50	Saline (n=357/10)	0.83	0.73	0.94	0.05	SAL / VPA	<0.0001
					VPA (n=330/10)	0.31	0.27	0.37	0.02	SAL / VPA+VNS	0.004
					VNS (n=287/8)	0.6	0.51	0.69	0.04	VPA / VPA+VNS	<0.0001
		Figure 1b	GLMM: Threshold ~ Group + Sex + Group * Sex + (1 | Animal/Channel), family = tweedie(link="log")	55	Saline (n=357/10)	0.9	0.79	1.02	0.05	SAL / VPA	<0.0001
					VPA (n=330/10)	0.33	0.29	0.39	0.02	SAL / VPA+VNS	0.001
					VNS (n=287/8)	0.63	0.54	0.73	0.04	VPA / VPA+VNS	<0.0001
		Figure 1b	GLMM: Threshold ~ Group + Sex + Group * Sex + (1 | Animal/Channel), family = tweedie(link="log")	60	Saline (n=357/10)	0.97	0.85	1.11	0.06	SAL / VPA	<0.0001
					VPA (n=330/10)	0.38	0.32	0.44	0.02	SAL / VPA+VNS	0.005
					VNS (n=287/8)	0.71	0.61	0.83	0.05	VPA / VPA+VNS	<0.0001
		Figure 1b	GLMM: Threshold ~ Group + Sex + Group * Sex + (1 | Animal/Channel), family = tweedie(link="log")	65	Saline (n=357/10)	1	0.88	1.14	0.06	SAL / VPA	<0.0001
					VPA (n=330/10)	0.44	0.38	0.51	0.03	SAL / VPA+VNS	0.01
					VNS (n=287/8)	0.75	0.65	0.87	0.05	VPA / VPA+VNS	<0.0001
		Figure 1b	GLMM: Threshold ~ Group + Sex + Group * Sex + (1 | Animal/Channel), family = tweedie(link="log")	70	Saline (n=357/10)	1.04	0.91	1.18	0.06	SAL / VPA	<0.0001
					VPA (n=330/10)	0.48	0.42	0.56	0.03	SAL / VPA+VNS	0.002
					VNS (n=287/8)	0.75	0.65	0.87	0.05	VPA / VPA+VNS	<0.0001
		Figure 1b	GLMM: Threshold ~ Group + Sex + Group * Sex + (1 | Animal/Channel), family = tweedie(link="log")	75	Saline (n=357/10)	1.08	0.95	1.23	0.07	SAL / VPA	<0.0001
					VPA (n=330/10)	0.47	0.41	0.55	0.03	SAL / VPA+VNS	0.01
					VNS (n=287/8)	0.81	0.7	0.94	0.06	VPA / VPA+VNS	<0.0001
