# Supplementary material for: Speech paired vagus nerve stimulation restores neural sound processing in a rat model of autism
Source: Front Neurosci. 2025 Jun 13;19:1600024. doi: 10.3389/fnins.2025.1600024 (PMC12202670; doi:10.3389/fnins.2025.1600024)
Supplement: Supplementary file 4 [file Table_3.xlsx]

## Sheet: Supplemental Table 3
	Figure	Model	Groups (n sites / n animal)	Repetition Rate	Linear predictor (log-odds)	Lower CI	Upper CI	SE	Contrast	Pvalue
	Figure 2c	GLMM: PL ~ Group + NB + Sex + Group * NB + Group * Sex + (1 | Animal/Channel), family=binomial	Saline (n=357/10)	7.5Hz	7.44	6.49	8.39	0.48	SAL / VPA	0.67
			VPA (n=330/10)		6.97	6.02	7.92	0.48	SAL / VPA+VNS	0.99
			VNS (n=287/8)		7.52	6.29	8.76	0.63	VPA / VPA+VNS	0.67
	Figure 2c	GLMM: PL ~ Group + NB + Sex + Group * NB + Group * Sex + (1 | Animal/Channel), family=binomial	Saline (n=357/10)	10Hz	9.02	7.75	10.28	0.64	SAL / VPA	0.59
			VPA (n=330/10)		8.32	7.14	9.5	0.6	SAL / VPA+VNS	0.7
			VNS (n=287/8)		8.38	6.99	9.76	0.7	VPA / VPA+VNS	0.99
	Figure 2c	GLMM: PL ~ Group + NB + Sex + Group * NB + Group * Sex + (1 | Animal/Channel), family=binomial	Saline (n=357/10)	12.5Hz	11.57	9.98	13.17	0.81	SAL / VPA	0.19
			VPA (n=330/10)		10.07	8.74	11.39	0.67	SAL / VPA+VNS	0.91
			VNS (n=287/8)		12	10.11	13.89	0.96	VPA / VPA+VNS	0.12
	Figure 2c	GLMM: PL ~ Group + NB + Sex + Group * NB + Group * Sex + (1 | Animal/Channel), family=binomial	Saline (n=357/10)	15Hz	16.39	13.49	19.28	1.47	SAL / VPA	0.007
			VPA (n=330/10)		11.91	10.35	13.47	11.91	SAL / VPA+VNS	0.09
			VNS (n=287/8)		13.06	10.96	15.17	13.06	VPA / VPA+VNS	0.56
	Figure 2d	GLMM: VS1 ~ Group + NB + Sex + Group * NB + Group * Sex + (1 | Animal/Channel), family=tweedie(link="log")	Saline (n=357/10)	7.5Hz	0.66	0.62	0.7	0.01	SAL / VPA	0.03
			VPA (n=330/10)		0.6	0.56	0.63	0.01	SAL / VPA+VNS	0.66
			VNS (n=287/8)		0.63	0.6	0.68	0.02	VPA / VPA+VNS	0.3
	Figure 2d	GLMM: VS1 ~ Group + NB + Sex + Group * NB + Group * Sex + (1 | Animal/Channel), family=tweedie(link="log")	Saline (n=357/10)	10Hz	0.69	0.65	0.73	0.01	SAL / VPA	0.28
			VPA (n=330/10)		0.65	0.61	0.69	0.01	SAL / VPA+VNS	0.96
			VNS (n=287/8)		0.68	0.64	0.73	0.02	VPA / VPA+VNS	0.46
	Figure 2d	GLMM: VS1 ~ Group + NB + Sex + Group * NB + Group * Sex + (1 | Animal/Channel), family=tweedie(link="log")	Saline (n=357/10)	12.5Hz	0.77	0.73	0.82	0.02	SAL / VPA	0.13
			VPA (n=330/10)		0.72	0.68	0.76	0.02	SAL / VPA+VNS	0.87
			VNS (n=287/8)		0.76	0.71	0.81	0.02	VPA / VPA+VNS	0.37
	Figure 2d	GLMM: VS1 ~ Group + NB + Sex + Group * NB + Group * Sex + (1 | Animal/Channel), family=tweedie(link="log")	Saline (n=357/10)	15Hz	0.89	0.85	0.94	0.02	SAL / VPA	0.41
			VPA (n=330/10)		0.85	0.8	0.9	0.02	SAL / VPA+VNS	0.82
			VNS (n=287/8)		0.87	0.82	0.92	0.02	VPA / VPA+VNS	0.81
	SFigure 2	GLMM: DR ~ Group + Burst + NB + Group * Burst + Group * NB + Burst * NB + (1 | Animal/Channel), family = tweedie(link="log")	Saline (n=357/10)	7.5Hz (Burst 1)	1.16745	0.894768	1.52322	0.158447	SAL / VPA	0.1504
			VPA (n=330/10)		0.819138	0.626018	1.07183	0.112372	SAL / VPA+VNS	0.804149
			VNS (n=287/8)		1.32462	0.98487	1.78158	0.200302	VPA / VPA+VNS	0.04
	SFigure 2	GLMM: DR ~ Group + Burst + NB + Group * Burst + Group * NB + Burst * NB + (1 | Animal/Channel), family = tweedie(link="log")	Saline (n=357/10)	7.5Hz (Burst 2)	1.63345	1.25288	2.12961	0.221058	SAL / VPA	0.519444
			VPA (n=330/10)		1.32626	1.01464	1.73359	0.181234	SAL / VPA+VNS	0.355568
			VNS (n=287/8)		2.15303	1.60188	2.89381	0.324824	VPA / VPA+VNS	0.0436162
	SFigure 2	GLMM: DR ~ Group + Burst + NB + Group * Burst + Group * NB + Burst * NB + (1 | Animal/Channel), family = tweedie(link="log")	Saline (n=357/10)	7.5Hz (Burst 3)	2.34484	1.80148	3.05209	0.315374	SAL / VPA	0.0579041
			VPA (n=330/10)		1.51977	1.16427	1.98383	0.206621	SAL / VPA+VNS	0.991677
			VNS (n=287/8)		2.40336	1.79051	3.22597	0.36096	VPA / VPA+VNS	0.0589083
	SFigure 2	GLMM: DR ~ Group + Burst + NB + Group * Burst + Group * NB + Burst * NB + (1 | Animal/Channel), family = tweedie(link="log")	Saline (n=357/10)	7.5Hz (Burst 4)	2.08218	1.59843	2.71233	0.280878	SAL / VPA	0.176095
			VPA (n=330/10)		1.48323	1.13541	1.93762	0.202234	SAL / VPA+VNS	0.824239
			VNS (n=287/8)		2.34531	1.74591	3.15049	0.353169	VPA / VPA+VNS	0.0601243
	SFigure 2	GLMM: DR ~ Group + Burst + NB + Group * Burst + Group * NB + Burst * NB + (1 | Animal/Channel), family = tweedie(link="log")	Saline (n=357/10)	7.5Hz (Burst 5)	2.26449	1.7396	2.94776	0.304665	SAL / VPA	0.060544
			VPA (n=330/10)		1.4727	1.12815	1.92248	0.20026	SAL / VPA+VNS	0.942918
			VNS (n=287/8)		2.41748	1.80102	3.24495	0.363092	VPA / VPA+VNS	0.03
	SFigure 2	GLMM: DR ~ Group + Burst + NB + Group * Burst + Group * NB + Burst * NB + (1 | Animal/Channel), family = tweedie(link="log")	Saline (n=357/10)	7.5Hz (Burst 6)	1.98715	1.52517	2.58907	0.268265	SAL / VPA	0.152924
			VPA (n=330/10)		1.39603	1.06836	1.82421	0.190541	SAL / VPA+VNS	0.666292
			VNS (n=287/8)		2.36152	1.75784	3.1725	0.355699	VPA / VPA+VNS	0.02
	SFigure 2	GLMM: DR ~ Group + Burst + NB + Group * Burst + Group * NB + Burst * NB + (1 | Animal/Channel), family = tweedie(link="log")	Saline (n=357/10)	10Hz (Burst 1)	1.19491	0.915829	1.55903	0.162165	SAL / VPA	0.153688
			VPA (n=330/10)		0.839896	0.641903	1.09896	0.115205	SAL / VPA+VNS	0.48883
			VNS (n=287/8)		1.50275	1.11747	2.02085	0.227121	VPA / VPA+VNS	0.01
	SFigure 2	GLMM: DR ~ Group + Burst + NB + Group * Burst + Group * NB + Burst * NB + (1 | Animal/Channel), family = tweedie(link="log")	Saline (n=357/10)	10Hz (Burst 2)	0.83456	0.638447	1.09091	0.114058	SAL / VPA	0.5274
			VPA (n=330/10)		0.678817	0.517907	0.889722	0.0937051	SAL / VPA+VNS	0.144799
			VNS (n=287/8)		1.21926	0.905387	1.64195	0.185157	VPA / VPA+VNS	0.0107662
	SFigure 2	GLMM: DR ~ Group + Burst + NB + Group * Burst + Group * NB + Burst * NB + (1 | Animal/Channel), family = tweedie(link="log")	Saline (n=357/10)	10Hz (Burst 3)	1.77752	1.36449	2.31558	0.239823	SAL / VPA	0.05
			VPA (n=330/10)		1.15412	0.883345	1.5079	0.157445	SAL / VPA+VNS	0.80006
			VNS (n=287/8)		2.01937	1.50328	2.71263	0.304078	VPA / VPA+VNS	0.01
	SFigure 2	GLMM: DR ~ Group + Burst + NB + Group * Burst + Group * NB + Burst * NB + (1 | Animal/Channel), family = tweedie(link="log")	Saline (n=357/10)	10Hz (Burst 4)	1.09002	0.834758	1.42333	0.148382	SAL / VPA	0.1812
			VPA (n=330/10)		0.777849	0.59399	1.01862	0.107024	SAL / VPA+VNS	0.512818
			VNS (n=287/8)		1.36085	1.01137	1.8311	0.20608	VPA / VPA+VNS	0.01
	SFigure 2	GLMM: DR ~ Group + Burst + NB + Group * Burst + Group * NB + Burst * NB + (1 | Animal/Channel), family = tweedie(link="log")	Saline (n=357/10)	10Hz (Burst 5)	1.71425	1.31587	2.23325	0.231326	SAL / VPA	0.0624937
			VPA (n=330/10)		1.11683	0.854653	1.45944	0.15246	SAL / VPA+VNS	0.678384
			VNS (n=287/8)		2.02844	1.51008	2.72473	0.305412	VPA / VPA+VNS	0.00858193
	SFigure 2	GLMM: DR ~ Group + Burst + NB + Group * Burst + Group * NB + Burst * NB + (1 | Animal/Channel), family = tweedie(link="log")	Saline (n=357/10)	10Hz (Burst 6)	1.05726	0.809552	1.38077	0.144006	SAL / VPA	0.157527
			VPA (n=330/10)		0.744079	0.568133	0.974516	0.102424	SAL / VPA+VNS	0.357985
			VNS (n=287/8)		1.39264	1.03482	1.87419	0.211013	VPA / VPA+VNS	0.005
	SFigure 2	GLMM: DR ~ Group + Burst + NB + Group * Burst + Group * NB + Burst * NB + (1 | Animal/Channel), family = tweedie(link="log")	Saline (n=357/10)	12.5Hz (Burst 1)	1.18865	0.910903	1.5511	0.161405	SAL / VPA	0.177281
			VPA (n=330/10)		0.846693	0.646939	1.10813	0.116244	SAL / VPA+VNS	0.292208
			VNS (n=287/8)		1.60634	1.19443	2.1603	0.242833	VPA / VPA+VNS	0.004
	SFigure 2	GLMM: DR ~ Group + Burst + NB + Group * Burst + Group * NB + Burst * NB + (1 | Animal/Channel), family = tweedie(link="log")	Saline (n=357/10)	12.5Hz (Burst 2)	0.343139	0.261095	0.450964	0.0478394	SAL / VPA	0.573952
			VPA (n=330/10)		0.282843	0.214764	0.372501	0.0397359	SAL / VPA+VNS	0.0667181
			VNS (n=287/8)		0.538692	0.398325	0.728524	0.0829702	VPA / VPA+VNS	0.004
	SFigure 2	GLMM: DR ~ Group + Burst + NB + Group * Burst + Group * NB + Burst * NB + (1 | Animal/Channel), family = tweedie(link="log")	Saline (n=357/10)	12.5Hz (Burst 3)	1.5012	1.15153	1.95705	0.203105	SAL / VPA	0.0715889
			VPA (n=330/10)		0.987766	0.755367	1.29167	0.135187	SAL / VPA+VNS	0.580953
			VNS (n=287/8)		1.83261	1.36354	2.46304	0.276443	VPA / VPA+VNS	0.006
	SFigure 2	GLMM: DR ~ Group + Burst + NB + Group * Burst + Group * NB + Burst * NB + (1 | Animal/Channel), family = tweedie(link="log")	Saline (n=357/10)	12.5Hz (Burst 4)	0.368408	0.280522	0.483829	0.0512283	SAL / VPA	0.209791
			VPA (n=330/10)		0.266422	0.202238	0.350977	0.037468	SAL / VPA+VNS	0.313746
			VNS (n=287/8)		0.494239	0.365416	0.668477	0.0761501	VPA / VPA+VNS	0.006
	SFigure 2	GLMM: DR ~ Group + Burst + NB + Group * Burst + Group * NB + Burst * NB + (1 | Animal/Channel), family = tweedie(link="log")	Saline (n=357/10)	12.5Hz (Burst 5)	1.57574	1.20891	2.05386	0.21305	SAL / VPA	0.0746225
			VPA (n=330/10)		1.04034	0.795709	1.36019	0.142292	SAL / VPA+VNS	0.455099
			VNS (n=287/8)		2.00356	1.4912	2.69196	0.301913	VPA / VPA+VNS	0.003
	SFigure 2	GLMM: DR ~ Group + Burst + NB + Group * Burst + Group * NB + Burst * NB + (1 | Animal/Channel), family = tweedie(link="log")	Saline (n=357/10)	12.5Hz (Burst 6)	0.31712	0.241229	0.416887	0.0442577	SAL / VPA	0.183831
			VPA (n=330/10)		0.226172	0.171471	0.298324	0.0319513	SAL / VPA+VNS	0.19866
			VNS (n=287/8)		0.448859	0.331599	0.607585	0.0693417	VPA / VPA+VNS	0.002
	SFigure 2	GLMM: DR ~ Group + Burst + NB + Group * Burst + Group * NB + Burst * NB + (1 | Animal/Channel), family = tweedie(link="log")	Saline (n=357/10)	15Hz (Burst 1)	1.21517	0.931136	1.58586	0.165067	SAL / VPA	0.114841
			VPA (n=330/10)		0.83095	0.634712	1.08786	0.114215	SAL / VPA+VNS	0.465713
			VNS (n=287/8)		1.54065	1.14534	2.0724	0.233069	VPA / VPA+VNS	0.006
	SFigure 2	GLMM: DR ~ Group + Burst + NB + Group * Burst + Group * NB + Burst * NB + (1 | Animal/Channel), family = tweedie(link="log")	Saline (n=357/10)	15Hz (Burst 2)	0.177401	0.13416	0.234577	0.0252868	SAL / VPA	0.445128
			VPA (n=330/10)		0.140377	0.105985	0.185929	0.0201282	SAL / VPA+VNS	0.136652
			VNS (n=287/8)		0.261282	0.192169	0.355251	0.0409558	VPA / VPA+VNS	0.006
	SFigure 2	GLMM: DR ~ Group + Burst + NB + Group * Burst + Group * NB + Burst * NB + (1 | Animal/Channel), family = tweedie(link="log")	Saline (n=357/10)	15Hz (Burst 3)	1.24323	0.952845	1.62212	0.16874	SAL / VPA	0.0424744
			VPA (n=330/10)		0.785298	0.59979	1.02818	0.107974	SAL / VPA+VNS	0.778256
			VNS (n=287/8)		1.42386	1.05851	1.91532	0.215408	VPA / VPA+VNS	0.009
	SFigure 2	GLMM: DR ~ Group + Burst + NB + Group * Burst + Group * NB + Burst * NB + (1 | Animal/Channel), family = tweedie(link="log")	Saline (n=357/10)	15Hz (Burst 4)	0.320561	0.243862	0.421382	0.0447268	SAL / VPA	0.139213
			VPA (n=330/10)		0.222544	0.168734	0.293516	0.0314298	SAL / VPA+VNS	0.492024
			VNS (n=287/8)		0.40346	0.29766	0.546867	0.0626048	VPA / VPA+VNS	0.009
	SFigure 2	GLMM: DR ~ Group + Burst + NB + Group * Burst + Group * NB + Burst * NB + (1 | Animal/Channel), family = tweedie(link="log")	Saline (n=357/10)	15Hz (Burst 5)	1.26418	0.96891	1.64942	0.171573	SAL / VPA	0.0444525
			VPA (n=330/10)		0.801247	0.612094	1.04885	0.110085	SAL / VPA+VNS	0.654644
			VNS (n=287/8)		1.50803	1.12128	2.02817	0.228001	VPA / VPA+VNS	0.005
	SFigure 2	GLMM: DR ~ Group + Burst + NB + Group * Burst + Group * NB + Burst * NB + (1 | Animal/Channel), family = tweedie(link="log")	Saline (n=357/10)	15Hz (Burst 6)	0.282915	0.214981	0.372316	0.0396373	SAL / VPA	0.120247
			VPA (n=330/10)		0.193703	0.146656	0.255843	0.0274979	SAL / VPA+VNS	0.340967
			VNS (n=287/8)		0.375687	0.277124	0.509305	0.0583268	VPA / VPA+VNS	0.003
